# Supplementary material
Source: PubMed Central journal article supplement (PMC3993271)
Supplement: AAC.01527-13_zac005142836so1.pdf [file AAC.01527-13_zac005142836so1.pdf]

1 SUPPLEMENTARY APPENDIX

2 CONTENTS

3 Supplemental Methods – Included patients, Definitions, Data Collection and PAP and Diagnostic

4 Workup of IFIs in the Study Hospital

5 i. Algorithm S1. Patients with newly diagnosed AML investigated in the study with  
6 case-control groups.

7 ii. Table S1. Epidemiology, clinical features and outcome of 21 AML patients with  
8 documented invasive fungal infection during 120-day study period

9

10 SUPPLEMENTAL METHODS

11 INCLUDED PATIENTS

12 We investigated 198 unselected consecutive patients with newly diagnosed AML, which  
13 correspond approximately to 75% of patients with newly diagnosed AML registered at MDACC  
14 during the years of study. Forty-six patients (23%) were excluded for the following reasons: 15  
15 patients were not followed in our institution, 13 patients had prior or subsequent stem cell  
16 transplantation during the study period and 18 patients did not receive any PAP at baseline (14  
17 patients) or during the study (4 patients). Consequently, our study population consisted of 152  
18 patients who had received > 2 days of PAP and were evaluable for type and duration of PAP  
19 drug use as well as for a diagnosis of IFI. Algorithm S1 shows the study population and case-  
20 control groups.

21

22

23

24 DEFINITIONS

25 Primary antifungal prophylaxis was defined as any systemic antifungal therapy given as  
26 prophylaxis for more than two consecutive days to a patient without current or previous clinical,  
27 microbiological and/or radiological evidence of either documented or presumed IFI.

28 Documented and possible IFIs were determined in accordance with the EORTC revised  
29 definitions (2008) (8). Patients with possible IFIs or those with clinical and microbiological  
30 evidence of IFI and non-characteristic CT scan abnormalities, according to EORTC definitions  
31 (2008), were categorized as having presumed IFIs. Overall IFIs included patients with  
32 documented and presumed IFIs. EAT was defined as the administration of an antifungal drug(s)  
33 in a patient with persistent febrile neutropenia and/or clinical findings possibly related to an IFI  
34 in which microbiologic and radiologic findings were negative for IFI. Galactomannan results for  
35 diagnosis of “probable aspergillosis” included one or more positive serum samples with an index  
36  $\geq 0.5$  within a 2-week timeframe of the clinical and radiological evidence of IFI. The date of IFI  
37 onset was considered as the date of the first clinical manifestations attributable to IFI or the date  
38 of the clinical/radiologic/microbiologic diagnosis.

39

40 DATA COLLECTION

41 We performed a pilot study to make uniform the data collection. Demographic, clinical and  
42 laboratory data were collected from the time of registration to the hospital until diagnosis of an  
43 IFI, loss of the patient to follow up, death or completion of 120 days after first remission-  
44 induction chemotherapy, whichever came first. Data concerning antifungal use were collected  
45 from the institution’s pharmacy database and matched with the information in patients’  
46 electronic medical records. We collected data about the type, dosage and duration of antifungal

47 drugs used as PAP in each prophylaxis period (PAP drug used without interruption) in each  
48 patient during the study period. We also collected information regarding clinical,  
49 epidemiological, laboratorial or complementary parameters (Table 1). The diagnosis of IFI was  
50 revised by 3 infectious diseases specialists (M.Z.R.G., V.M. and D.P.K.).

51

#### 52 PAP AND DIAGNOSTIC WORKUP OF IFIS IN THE STUDY HOSPITAL

53 There was no explicit protocol for PAP usage in AML patients during the study. The  
54 diagnostic workup of IFIs in the hospital during the study period was standardized, patients were  
55 closely followed and exams and procedures were performed when indicated. The diagnostic  
56 workup did not change during the study period, including procedures in the clinical microbiology  
57 laboratory. Serum galactomannan tests were the only biomarker for IFI routinely used as part of  
58 diagnostic workup during the years of study (9).

59

60

61

62

63

64

65

66

67

68

69

70  
71  
72  
73  
74  
75  
76  
77  
78  
79  
80  
81  
82  
83  
84  
85  
86  
87

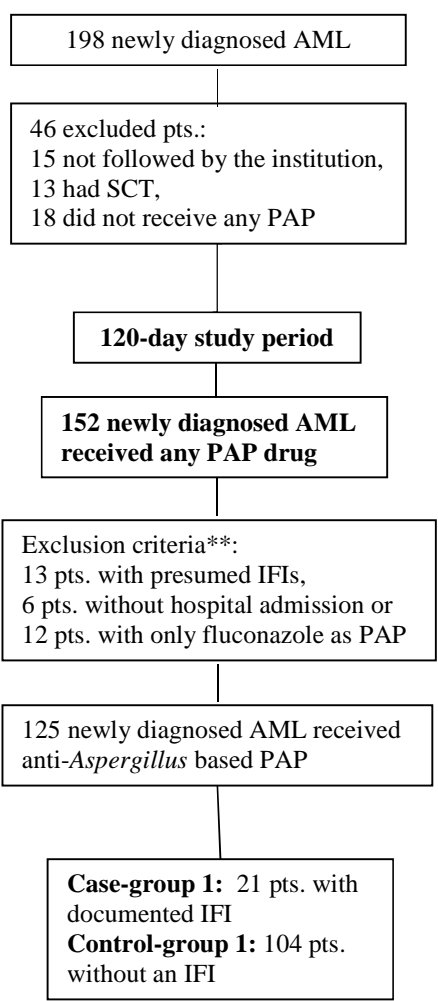

Supplemental Figure S1.

Table S1: Epidemiology, clinical features and outcome of 21 AML patients with documented IFIs during 120-day study period

| n.               | Age/<br>Gender | PAP drug <sup>a</sup> | Duration of<br>PAP drug<br>use <sup>a</sup> (days) | Time to<br>IFI <sup>b</sup> | Diagnosis of<br>Documented<br>IFI <sup>c</sup> | Agents of IFI                                                                                                                              | Positive GM;                                                        | Clinical forms                    | Death |
|------------------|----------------|-----------------------|----------------------------------------------------|-----------------------------|------------------------------------------------|--------------------------------------------------------------------------------------------------------------------------------------------|---------------------------------------------------------------------|-----------------------------------|-------|
|                  |                |                       |                                                    |                             |                                                |                                                                                                                                            | total n.,<br>n. of consecutives,<br>mean level (range) <sup>d</sup> |                                   |       |
| 1                | 21/F           | Voriconazole (PO)     | 3                                                  | 33                          | Probable                                       | IA                                                                                                                                         | 4, 3 consecutives,<br>0.76 (0.53 – 1.3)                             | Pulmonary                         | No    |
| 2 <sup>e,f</sup> | 55/F           | Caspofungin           | 46                                                 | 56                          | Definite                                       | <i>Aspergillus niger</i> (bronchial washing); <i>Paecilomyces</i> sp. and hyphae invading tissue (lung tissue); rare septated hyphae (BAL) | 1, 3.51                                                             | Pulmonary/<br>Osteomyelitis (rib) | No    |
| 3 <sup>e</sup>   | 57/F           | Posaconazole          | 17                                                 | 23                          | Probable                                       | IA                                                                                                                                         | 1, 0.83                                                             | Pulmonary                         | No    |
| 4                | 70/F           | Posaconazole          | 26                                                 | 32                          | Definite                                       | Mold sterile hyphae (skin biopsy)                                                                                                          | 1, 0.76                                                             | Disseminated                      | No    |

Table S1. (Continued)

| n.               | Age/<br>Gender | PAP drug <sup>a</sup> | Duration of<br>PAP drug use <sup>a</sup><br>(days) | Time to<br>IFI <sup>b</sup> | Diagnosis of<br>Documented<br>IFI <sup>c</sup> | Agents of IFI                                                                                             | Positive GM;                                                        | Clinical forms | Death |
|------------------|----------------|-----------------------|----------------------------------------------------|-----------------------------|------------------------------------------------|-----------------------------------------------------------------------------------------------------------|---------------------------------------------------------------------|----------------|-------|
|                  |                |                       |                                                    |                             |                                                |                                                                                                           | total n.,<br>n. of consecutives, mean<br>level (range) <sup>d</sup> |                |       |
| 5 <sup>e</sup>   | 72/M           | Micafungin            | 11                                                 | 16                          | Definite                                       | <i>Coccidioides</i> sp. (positive IGM immunodiffusion test),                                              | -                                                                   | Pulmonary      | No    |
| 6 <sup>e</sup>   | 61/F           | Fluconazole (PO)      | 64                                                 | 104                         | Probable                                       | IA                                                                                                        | 6, 2 consecutives, 0.90 (0.57 – 1.41)                               | Pulmonary      | No    |
| 7 <sup>e</sup>   | 63/F           | Posaconazole          | 82                                                 | 111                         | Probable                                       | <i>Fusarium</i> sp. (sputum)                                                                              | 3, non-consecutives, 0.61 (0.53 – 0.72)                             | Disseminated   | No    |
| 8 <sup>f</sup>   | 65/M           | Anidulafungin         | 28                                                 | 60                          | Probable                                       | IA                                                                                                        | 1, 0.56                                                             | Pulmonary      | No    |
| 9 <sup>e,f</sup> | 62/F           | Micafungin            | 5                                                  | 15                          | Definite                                       | <i>Candida krusei</i> (blood) <sup>g</sup> and <i>Candida parapsilosis</i> (blood and urine) <sup>g</sup> | -                                                                   | Disseminated   | No    |
| 10 <sup>e</sup>  | 82/M           | Fluconazole (PO)      | 1 <sup>h</sup>                                     | 29                          | Probable                                       | IA                                                                                                        | 2, non-consecutives, 0.60 (0.58 – 0.63)                             | Pulmonary      | No    |
| 11               | 64/F           | Anidulafungin         | 24 <sup>i</sup>                                    | 29                          | Definite                                       | <i>Candida glabrata</i> (blood) <sup>g1</sup> ; few yeast (BAL)                                           | -                                                                   | Disseminated   | No    |
| 12               | 61/M           | Caspofungin           | 6                                                  | 7                           | Probable                                       | IA                                                                                                        | 5, 3 consecutives, 0.72 (0.55 – 0.97)                               | Pulmonary      | No    |
| 13 <sup>e</sup>  | 53/F           | Caspofungin           | 4                                                  | 17                          | Probable                                       | IA                                                                                                        | 1, 0.80                                                             | Pulmonary      | No    |
| 14 <sup>e</sup>  | 72/M           | Micafungin            | 9                                                  | 11                          | Definite                                       | Hyphae invading tissue (nasal lesion)                                                                     | 1, 1.26                                                             | Sino-pulmonary | No    |

|                   |      |                             |    |    |          |                                                                                 |         |              |                  |
|-------------------|------|-----------------------------|----|----|----------|---------------------------------------------------------------------------------|---------|--------------|------------------|
| 15 <sup>e</sup>   | 67/F | Posaconazole and Micafungin | 18 | 21 | Probable | IA, previous <i>Aspergillus fumigatus</i> (sputum) colonization                 | 1, 0.64 | Pulmonary    | Yes <sup>i</sup> |
| 16 <sup>e,i</sup> | 40/F | Anidulafungin               | 9  | 13 | Definite | <i>Geotrichum capitatus</i> , a.k.a. <i>Blastoschizomyces capitatus</i> (blood) | -       | Disseminated | No               |

Table S1. (Continued)

| n.                | Age/<br>Gender | PAP drug <sup>a</sup> | Duration of<br>PAP drug<br>use <sup>a</sup> (days) | Time to<br>IFI <sup>b</sup> | Diagnosis of<br>Documented<br>IFI <sup>c</sup> | Agents of IFI                                                                                                                                             | Positive GM;<br>total n.,<br>n. of consecutives,<br>mean level (range) <sup>d</sup> | Clinical forms | Death            |
|-------------------|----------------|-----------------------|----------------------------------------------------|-----------------------------|------------------------------------------------|-----------------------------------------------------------------------------------------------------------------------------------------------------------|-------------------------------------------------------------------------------------|----------------|------------------|
| 17                | 69/F           | Caspofungin           | 9                                                  | 8                           | Probable                                       | IA                                                                                                                                                        | 4, 4 consecutives,<br>0.73 (0.56 – 0.81)                                            | Pulmonary      | No               |
| 18 <sup>e,i</sup> | 63/M           | Caspofungin           | 13                                                 | 17                          | Definite                                       | <i>Fusarium</i> sp. (lymph nodes)                                                                                                                         | 1, 0.86                                                                             | Disseminated   | Yes <sup>i</sup> |
| 19 <sup>e</sup>   | 77/M           | Voriconazole (PO)     | 19                                                 | 21                          | Probable                                       | IA                                                                                                                                                        | 1, 1.20                                                                             | Pulmonary      | Yes <sup>i</sup> |
| 20 <sup>e,f</sup> | 70/F           | Caspofungin           | 10                                                 | 84                          | Probable                                       | IA                                                                                                                                                        | 4, 2 consecutives,<br>0.70 (0.52 – 1.07)                                            | Pulmonary      | No               |
| 21 <sup>e,f</sup> | 54/F           | Anidulafungin         | 20                                                 | 20                          | Definite                                       | <i>Candida glabrata</i> (2 blood and 1 bone marrow cultures) <sup>§2</sup> ; yeast like forms invading tissue (skin lesion); yeast < 10.000CFU/ml (urine) | -                                                                                   | Disseminated   | Yes              |

Note: AML, acute myeloid leukemia; BAL, bronchoalveolar lavage; CFU, *colony-forming unit*; GM, serum galactomannan tests; FRIC, first remission-induction chemotherapy; IA, “invasive aspergillosis”; IFI, invasive fungal infection; IGM, *immunoglobulin M*; PAP, primary antifungal therapy; PO, per os; <sup>a</sup> PAP drug associated to D-IFI; <sup>b</sup> time to IFI after FRIC (days); <sup>c</sup> definite or probable IFI according to EORTC/MSG criteria; <sup>d</sup> among our probable IFI cases, GM levels were low and did not differentiate from those with definite *Fusarium* or *Paecilomyces* infections with *Aspergillus niger* colonization; <sup>e</sup> case with absolute neutrophil counts below 0.10 at time of D-IFI started; <sup>f</sup> therapy-related AML; <sup>§</sup> MIC of caspofungin was 0.5 mcg/ml for both *C. krusei* (intermediate) and *C. parapsilosis* (susceptible); <sup>§1</sup> 0.12 mcg/ml for *C. glabrata* (susceptible); <sup>§2</sup> 8 mcg/ml for *C. glabrata* (non-susceptible). Micafungin and anidulafungin were not tested; <sup>h</sup> patient was taking caspofungin for 26 days during hospital admission and then was discharged with oral fluconazole; <sup>i</sup> initial period of use as empirical antifungal therapy; <sup>j</sup> death related to IFI; <sup>l</sup> received 3 days of fluconazole prophylaxis before the start of echinocandin PAP.
